# Supplementary material
Source: PubMed Central journal article supplement (PMC2547028)
Supplement: supp_74_18_5615__1.pdf [file supp_74_18_5615__1.pdf]

SUPPLEMENTAL DATA:

Supplemental Table 1. Corrected average pairwise differences ( $\theta[\pi]$ , above diagonal) and pairwise fixation indices (FST, below diagonal) for *nirK*.

| Site | Result for study site <sup>a</sup> : |              |              |              |              |
|------|--------------------------------------|--------------|--------------|--------------|--------------|
|      | R89                                  | R97          | R00          | R01          | R03          |
| R89  |                                      | <b>4.312</b> | 1.344        | <b>3.201</b> | <b>4.564</b> |
| R97  | <b>0.060</b>                         |              | <b>3.021</b> | 1.569        | 1.825        |
| R00  | <b>0.029</b>                         | <b>0.049</b> |              | 0.905        | 0.922        |
| R01  | <b>0.048</b>                         | 0.028        | 0.015        |              | -1.031       |
| R03  | <b>0.069</b>                         | 0.034        | 0.016        | -0.023       |              |

<sup>a</sup>Bold values are significant at  $P < 0.05$ .
