# Supplementary material
Source: PubMed Central journal article supplement (PMC2547028)

#### SUPPLEMENTAL FIGURES LEGEND:

Supplemental Figure 1. Neighbor-joining tree of *nirS* sequences obtained from wet season soils. Values on nodes are bootstrap scores based on percent occurrence of 500 resamplings.

Supplemental Figure 2. Neighbor-joining tree of *nirK* sequences obtained from wet season soils. Values on nodes are bootstrap scores after 500 resamplings.

Supplemental Figure 3. Rarefaction curves for *nirS* (top) and *nirK* (bottom), as determined in DOTUR using a 3% DNA sequence similarity cut-off.

Fig. 1

0.1 substitutions

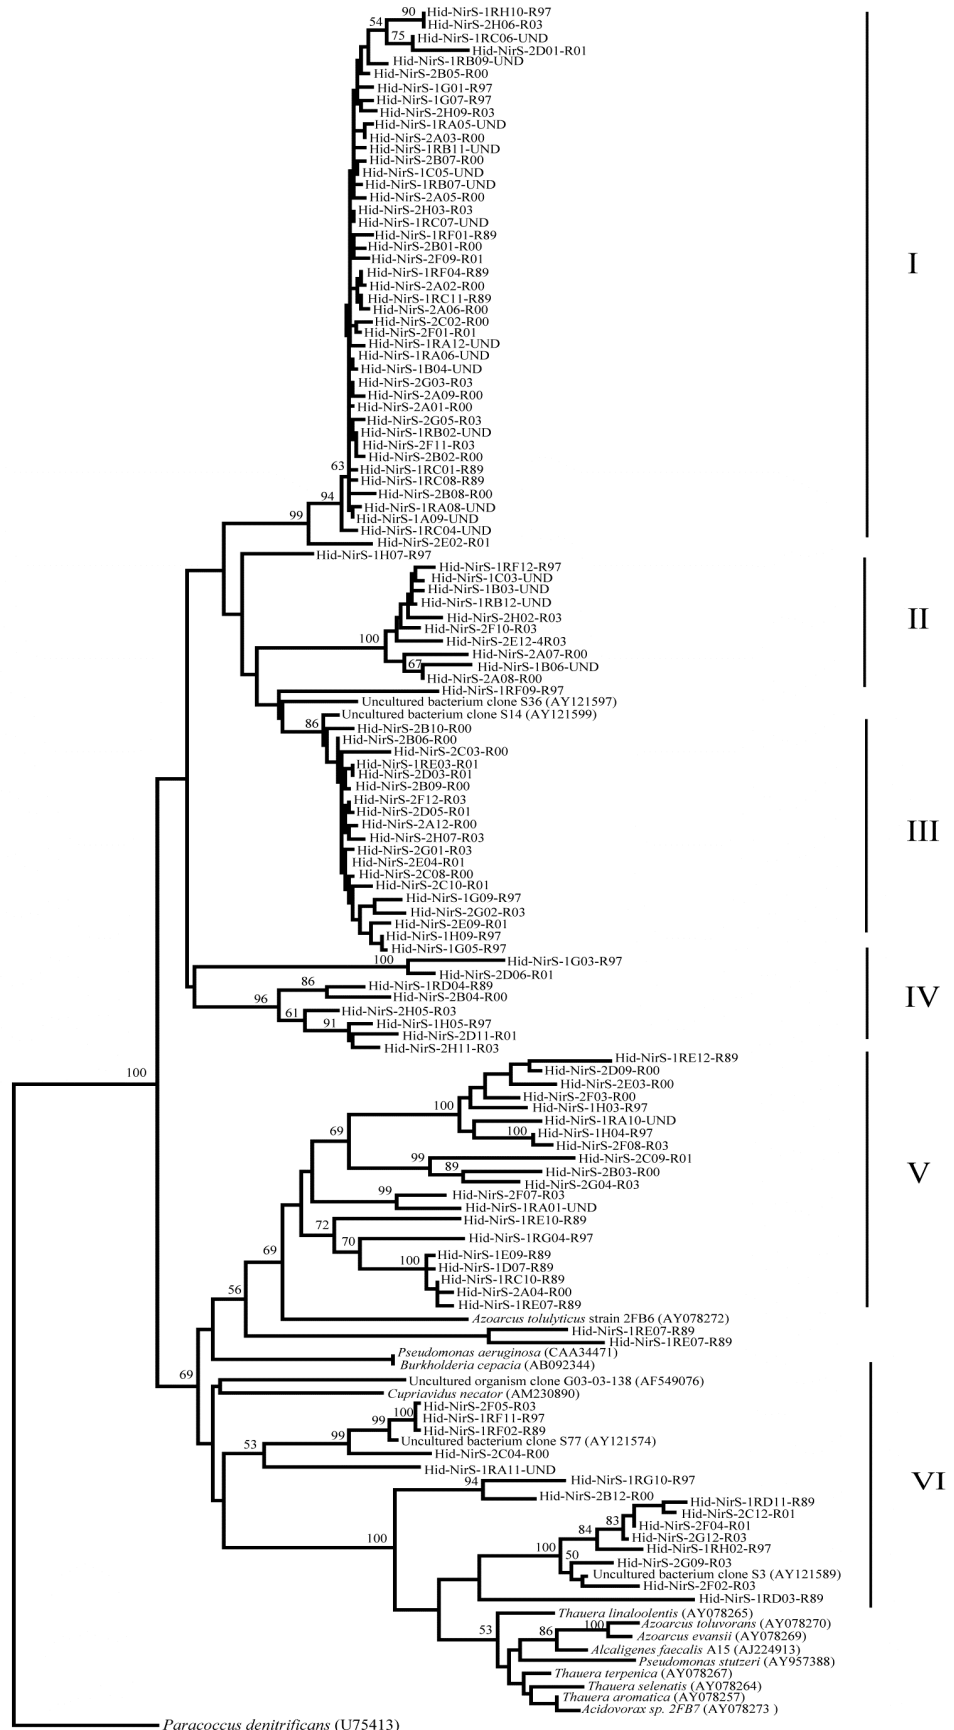

Fig. 2

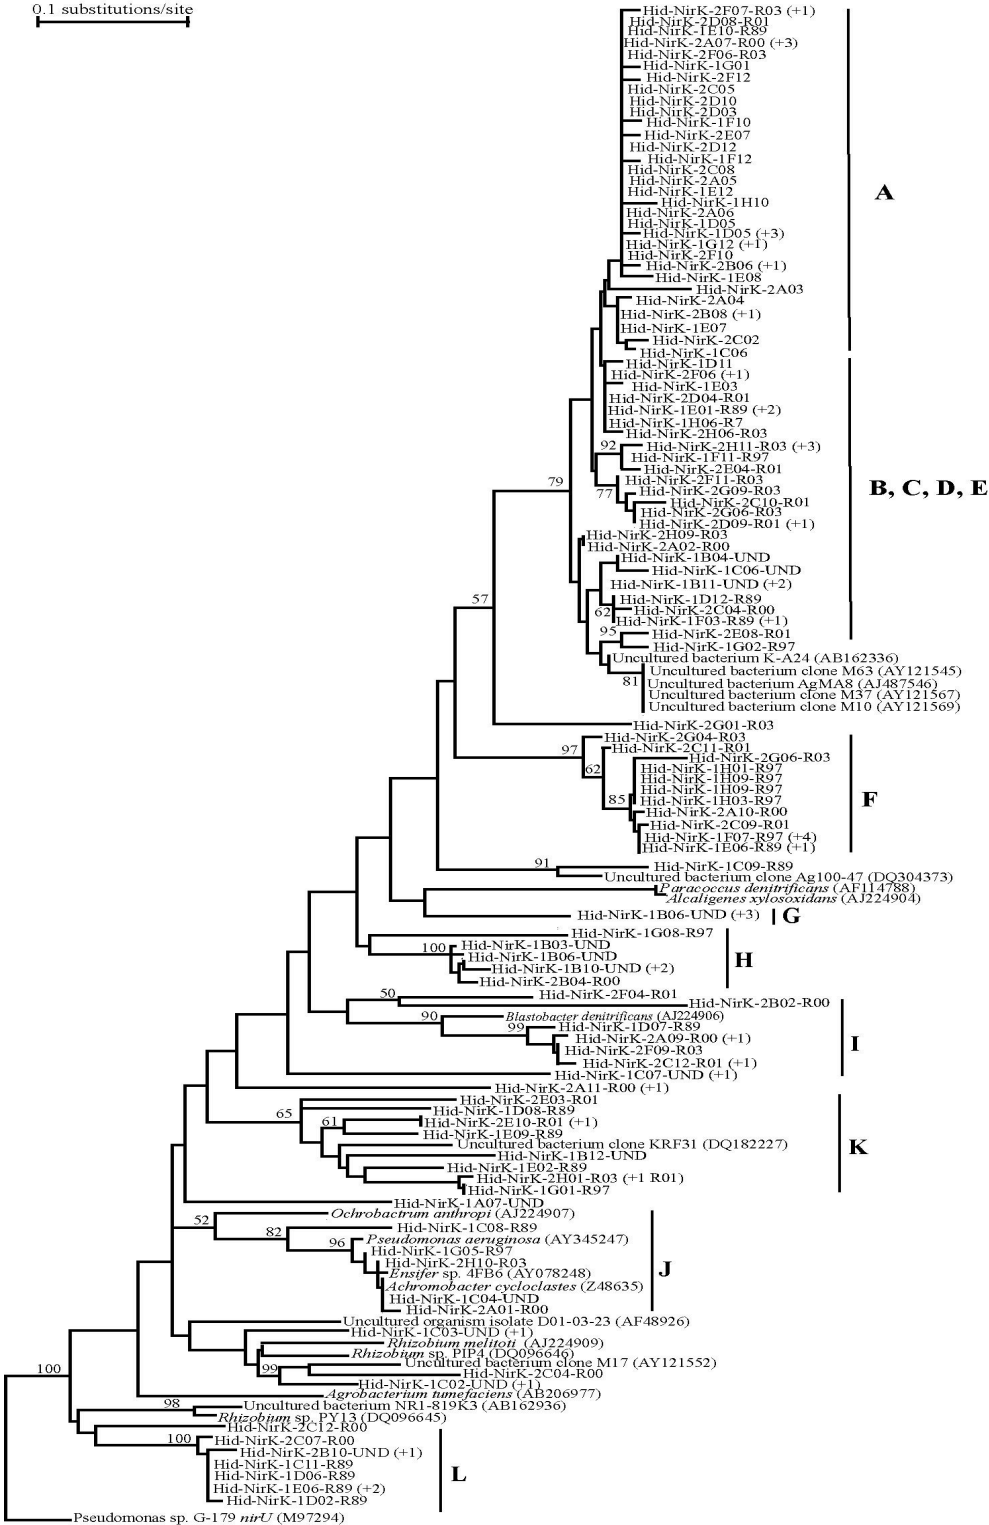

Fig 3.

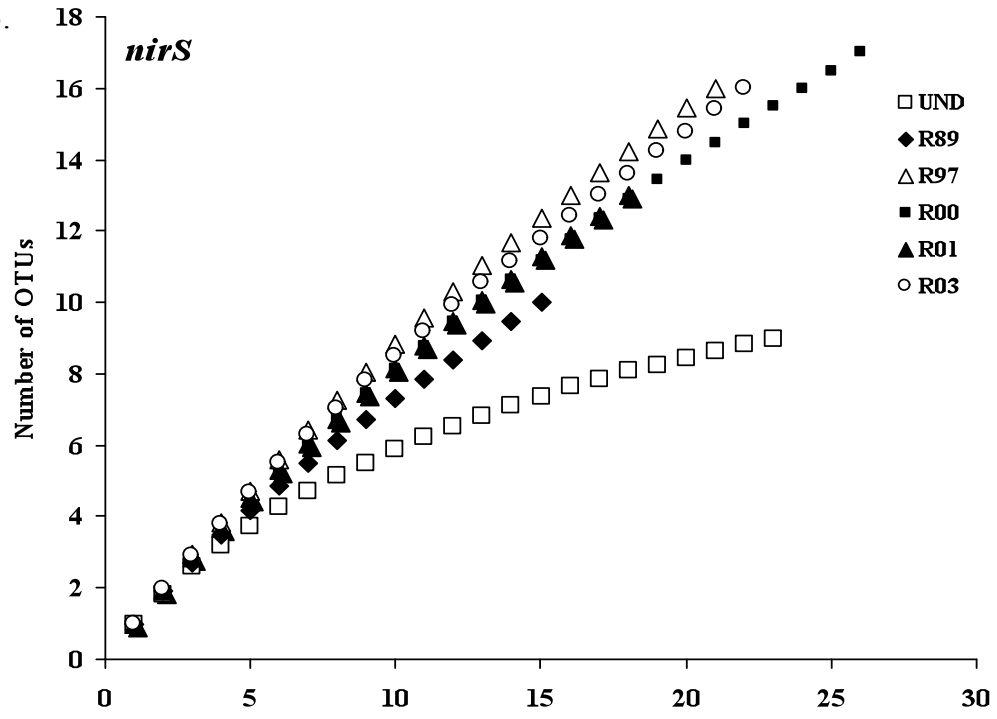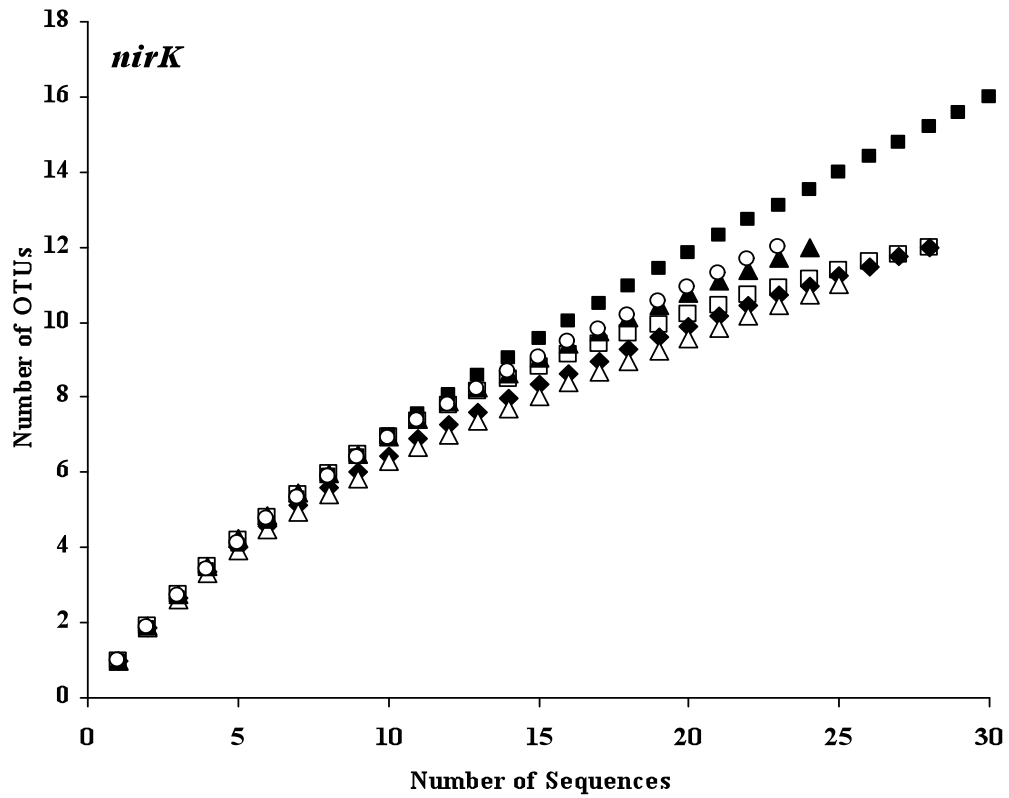

Supplement: supp_74_18_5615__2.pdf [file supp_74_18_5615__2.pdf]
